# Supplementary material for: Microtubule stabilization in vivo by nucleation-incompetent γ-tubulin complex
Source: PubMed Central journal article supplement — J Cell Sci. 2011 Mar 28;124(8):1207–13. doi: 10.1242/jcs.083741 (PMC3065382; doi:10.1242/jcs.083741), 2011-03-28
Supplement: supp_124.8.1207_JCS083741SuppTableS1.pdf [file supp_124.8.1207_JCS083741SuppTableS1.pdf]

**Anders and Sawin, Table S1**  
**Fission yeast strains used in this work**

| Figure     | Strain Number | Genotype                                                                                                              |
|------------|---------------|-----------------------------------------------------------------------------------------------------------------------|
| Fig. 1,S1  | KS3858        | <i>h+ gfh1-3xGFP:ura4+ alp4-tdT:natMX6 ade6-210 leu1-32 ura4-D18</i>                                                  |
| Fig. 1,S1  | KS3860        | <i>h+ mod21-3xGFP:ura4+ alp4-tdT:natMX6 ade6-210 leu1-32 ura4-D18</i>                                                 |
| Fig. 1,S1  | KS3862        | <i>h+ alp16-3xGFP:ura4+ alp4-tdT:natMX6 ade6-210 leu1-32 ura4-D18</i>                                                 |
| Fig. 1     | KS3101        | <i>h- alp4-tdT:natMX6 ade6-210 leu1-32 ura4-D18</i>                                                                   |
| Fig. 1     | KS5022        | <i>h- gfh1-3xGFP:ura4+ alp4-tdT:natMX6 mto1Δ::kanMX6 ade6-216 leu1-32 ura4-D18</i>                                    |
| Fig. 1     | KS5024        | <i>h- mod21-3xGFP:ura4+ alp4-tdT:natMX6 mto1Δ::kanMX6 ade6-216 leu1-32 ura4-D18</i>                                   |
| Fig. 1     | KS5026        | <i>h- alp16-3xGFP:ura4+ alp4-tdT:natMX6 mto1Δ::kanMX6 ade6-216 leu1-32 ura4-D18</i>                                   |
| Fig. 1     | KS1366        | <i>h+ alp4-3HA:kanMX6 ade6-216 leu1-32 ura4-D18</i>                                                                   |
| Fig. 1     | KS4239        | <i>h- gfh1-3xGFP:ura4+ alp4-3HA:kanMX6 ade6-216 leu1-32 ura4-D18</i>                                                  |
| Fig. 1     | KS4233        | <i>h+ gfh1-3xGFP:ura4+ alp4-3HA:kanMX6 mto1Δ::kanMX6 ade6-210 leu1-32 ura4-D18</i>                                    |
| Fig. 1     | KS4241        | <i>h- mod21-3xGFP:ura4+ alp4-3HA:kanMX6 ade6-216 leu1-32 ura4-D18</i>                                                 |
| Fig. 1     | KS4234        | <i>h- mod21-3xGFP:ura4 alp4-3HA:kanMX6 mto1Δ::kanMX6 ade6-210 his3- leu1-32 ura4-D18</i>                              |
| Fig. 1     | KS4243        | <i>h- alp16-3xGFP:ura4+ alp4-3HA:kanMX6 ade6-210 leu1-32 ura4-D18</i>                                                 |
| Fig. 1     | KS4237        | <i>h- alp16-3xGFP:ura4+ alp4-3HA:kanMX6 mto1Δ::kanMX6 ade6-210 leu1-32 ura4-D18</i>                                   |
| Fig. 2     | KS1282        | <i>h+ kanMX6:nmt81::GFP-atb2 mto1Δ::kanMX6 ade6-210 leu1-32 ura4-D18</i>                                              |
| Fig. 2     | KS3785        | <i>h- kanMX6:nmt81::GFP-atb2 alp4-tdT:natMX6 ade6-210 leu1-32 ura4-D18</i>                                            |
| Fig. 2     | KS4254        | <i>h+ mto1Δ::kanMX6 kanMX6:nmt81::GFP-atb2 alp4-tdT:natMX6 gfh1Δ::hphMX6 ade6-? leu1-32 ura4-D18</i>                  |
| Fig. 2     | KS4387        | <i>h- mto1Δ::kanMX6 kanMX6:nmt81::GFP-atb2 alp4-tdT:natMX6 mod21Δ::hphMX6 ade6-216 leu1-32 ura4-D18</i>               |
| Fig. 2     | KS4484        | <i>h- mto1Δ::kanMX6 kanMX6:nmt81::GFP-atb2 alp4-tdT:natMX6 gfh1Δ::hphMX6 mod21Δ::hphMX6 ade6-210 leu1-32 ura4-D18</i> |
| Fig. 2     | KS4671        | <i>h+ mto1Δ::kanMX6 kanMX6:nmt81::GFP-atb2 alp4-tdT:natMX6 gfh1Δ::hphMX6 alp16Δ::natMX6 ade6-? leu1-? ura4-?</i>      |
| Fig. 2     | KS5459        | <i>h+ mto1Δ::kanMX6 cut12-tdT:kanMX6 hphMX:nmt81::GFP-atb2 ade6-210 leu1-32 ura4-D18</i>                              |
| Fig. 2,3   | KS4669        | <i>h+ mto1Δ::kanMX6 kanMX6:nmt81::GFP-atb2 alp4-tdT:natMX6 alp16Δ::natMX6 ade6-? leu1-? ura4-?</i>                    |
| Fig. 2,3,4 | KS3779        | <i>h- mto1Δ::kanMX6 kanMX6:nmt81::GFP-atb2 alp4-tdT:natMX6 ade6-216 leu1-32 ura4-D18</i>                              |
| Fig. S1    | KS4006        | <i>h+ gfh1-3xGFP:ura4+ alp4-tdT:natMX6 alp16Δ::natMX6 mod21Δ::kanMX6 ade6-210 leu1-32 ura4-D18</i>                    |
| Fig. S1    | KS4009        | <i>h+ gfh1-3xGFP:ura4+ alp4-tdT:natMX6 alp16Δ::natMX6 ade6-210 leu1-32 ura4-D18</i>                                   |
| Fig. S1    | KS4010        | <i>h+ gfh1-3xGFP:ura4+ alp4-tdT:natMX6 mod21Δ::kanMX6 ade6-210 leu1-32 ura4-D18</i>                                   |
| Fig. S1    | KS4012        | <i>h- mod21-3xGFP:ura4+ alp4-tdT:natMX6 alp16Δ::natMX6 gfh1Δ::kanMX6 ade6-210 leu1-32 ura4-D18</i>                    |
| Fig. S1    | KS4013        | <i>h- mod21-3xGFP:ura4+ alp4-tdT:natMX6 gfh1Δ::kanMX6 ade6-210 leu1-32 ura4-D18</i>                                   |
| Fig. S1    | KS4017        | <i>h+ mod21-3xGFP:ura4+ alp4-tdT:natMX6 alp16Δ::natMX6 ade6-210 leu1-32 ura4-D18</i>                                  |
| Fig. S1    | KS4023        | <i>h+ alp16-3xGFP:ura4+ alp4-tdT:natMX6 gfh1Δ::kanMX6 mod21Δ::kanMX6 ade6-210 leu1-32 ura4-D18</i>                    |
| Fig. S1    | KS4262        | <i>h- alp16-3xGFP:ura4+ alp4-tdT:natMX6 gfh1Δ::kanMX6 ade6-210 leu1-32 ura4-D18</i>                                   |
| Fig. S1    | KS4036        | <i>h- alp16-3xGFP:ura4+ alp4-tdT:natMX6 mod21Δ::kanMX6 ade6-210 leu1-32 ura4-D18</i>                                  |
| Fig. S2    | KS5198        | <i>h+ pcp1-GFP:kanMX6 alp4-tdT:natMX6 mto1Δ::kanMX6 ade6-216 leu1-32 ura4-D18</i>                                     |
| Fig. S2    | KS5200        | <i>h+ pcp1-GFP:kanMX6 alp4-tdT:natMX6 ade6-216 leu1-32 ura4-D18</i>                                                   |
| Fig. S2    | KS5201        | <i>h- pcp1-GFP:kanMX6 hphMX6:nmt81:mCh-atb2 ade6-216 leu1-32 ura4-D18</i>                                             |
| Fig. S2    | KS5258        | <i>h- pcp1-GFP:kanMX6 hphMX6:nmt81:mCh-atb2 mto1Δ::kanMX6 ade6-216 leu1-32 ura4-D18</i>                               |
| Fig. S2    | KS5497        | <i>h- alp4-GFP:natMX6 hphMX6:nmt81:mCh-atb2 ade6-210 leu1-32 ura4-D18</i>                                             |
| Fig. S2    | KS5499        | <i>h- alp4-GFP:natMX6 hphMX6:nmt81:mCh-atb2 mto1Δ::kanMX6 ade6-210 leu1-32 ura4-D18</i>                               |
