# Supplementary figures and images for: Microtubule stabilization in vivo by nucleation-incompetent γ-tubulin complex
Source: PubMed Central journal article supplement — J Cell Sci. 2011 Mar 28;124(8):1207–13. doi: 10.1242/jcs.083741 (PMC3065382; doi:10.1242/jcs.083741), 2011-03-28

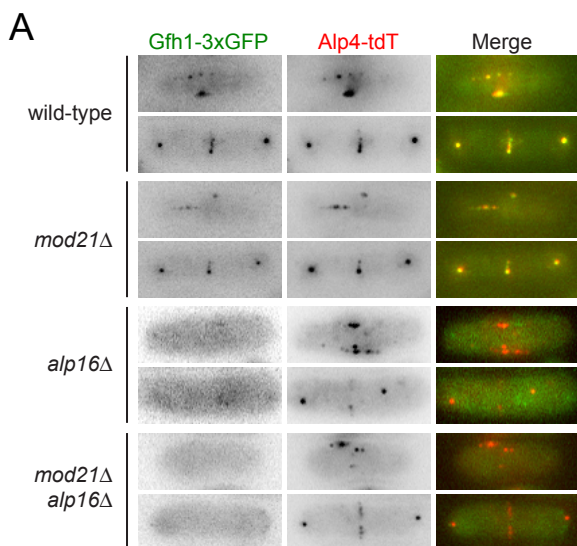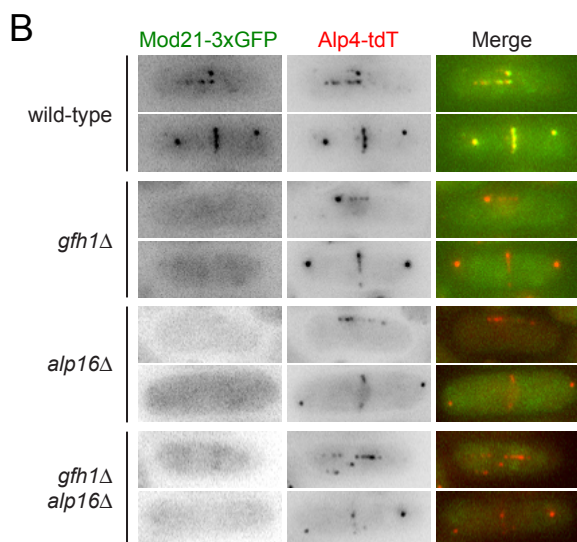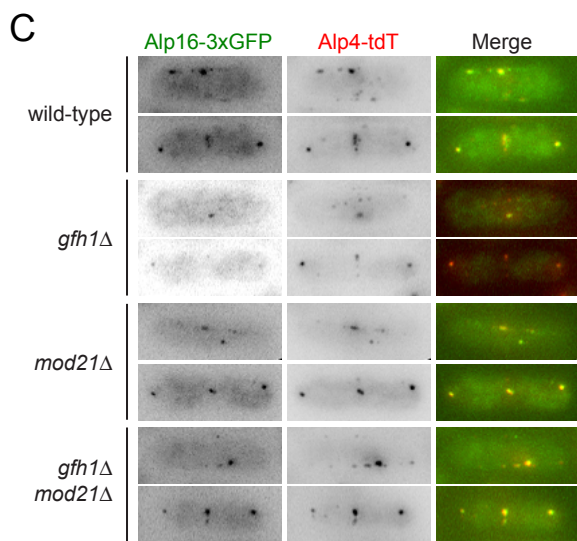

Supplement: supp_124.8.1207_JCS083741FigS1.pdf [file supp_124.8.1207_JCS083741FigS1.pdf]

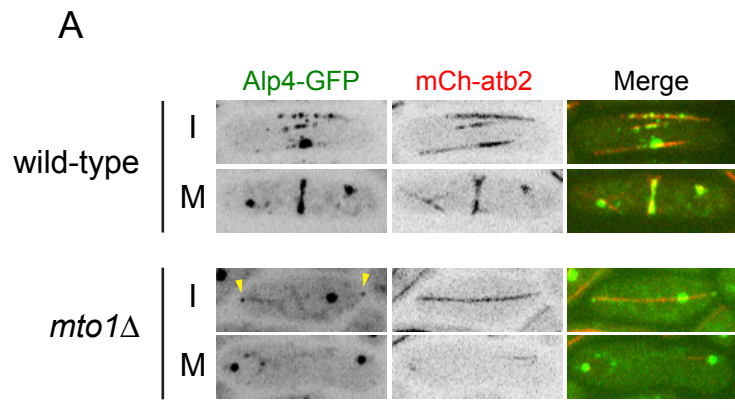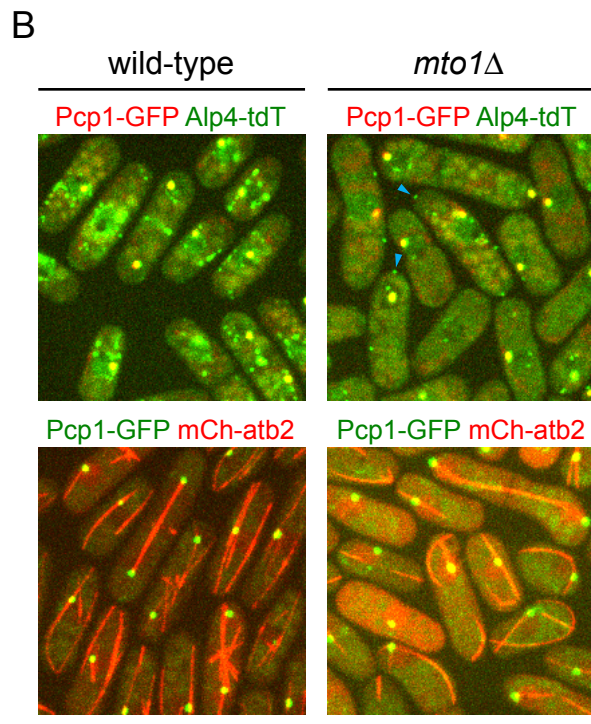

Supplement: supp_124.8.1207_JCS083741FigS2.pdf [file supp_124.8.1207_JCS083741FigS2.pdf]
